# Supplementary material for: Quantitative Proteomic Analysis of Zearalenone-Induced Intestinal Damage in Weaned Piglets
Source: MDPI journal article supplement (doi:10.3390/toxins14100702), 2022-10-13
Supplement: s1 [file s1]

## Article

# Quantitative Proteomic Analysis of Zearalenone-Induced Intestinal Damage in Weaned Piglets

Lulu Ma, Yanping Jiang, Fuguang Lu, Shujing Wang, Mei Liu, Faxiao Liu, Libo Huang, Yang Li, Ning Jiao, Shuzhen Jiang, Xuejun Yuan, and Weiren Yang

**Table S6.** Ingredients and nutrient contents of the basal diet (air-dry basis)<sup>1</sup>.

| Ingredients            | Content, % | Nutrients                   | Analyzed values, % |
|------------------------|------------|-----------------------------|--------------------|
| Expanded corn          | 64.43      | Metabolizable energy, MJ/kg | 13.86              |
| Whey powder, CP 3%     | 5.0        | Crude protein               | 18.48              |
| Fermented soybean meal | 14.0       | Calcium                     | 0.74               |
| Expanded soybean       | 8.5        | Total phosphorus            | 0.62               |
| Fish meal, CP 63.28%   | 4.0        | STTD phosphorus             | 0.41               |
| CaHPO <sub>4</sub>     | 1.15       | ATTD phosphorus             | 0.38               |
| Pulverized Limestone   | 0.7        | Lysine                      | 1.38               |
| NaCl                   | 0.2        | Methionine                  | 0.40               |
| L-Lysine HCl           | 0.76       | Sulfur amino acid           | 0.66               |
| DL-Methionine          | 0.08       | Threonine                   | 0.85               |
| L-Threonine            | 0.16       | Tryptophan                  | 0.23               |
| L-Tryptophan           | 0.02       |                             |                    |
| Premix <sup>1</sup>    | 1.00       |                             |                    |
| Total                  | 100.00     |                             |                    |

<sup>1</sup>Supplied per kilogram of diet: vitamin A, 3300 IU; vitamin D<sub>3</sub>, 330 IU; vitamin E, 24 IU; vitamin K<sub>3</sub>, 0.75 mg; vitamin B<sub>1</sub>, 1.50 mg; vitamin B<sub>2</sub>, 5.25 mg; vitamin B<sub>6</sub>, 2.25mg; vitamin B<sub>12</sub>, 0.026 mg; pantothenic acid, 15.00 mg; niacin, 22.50 mg; biotin, 0.075 mg; folic acid, 0.45 mg; Mn (MnSO<sub>4</sub>·H<sub>2</sub>O), 4.00 mg; Fe (FeSO<sub>4</sub>·H<sub>2</sub>O), 90 mg; Zn (ZnSO<sub>4</sub>·H<sub>2</sub>O), 90 mg; Cu (CuSO<sub>4</sub>·5H<sub>2</sub>O), 6.00 mg; I (KIO<sub>3</sub>), 0.14 mg; Se (Na<sub>2</sub>SeO<sub>3</sub>), 0.30 mg. STTD, standardized total tract digestible; ATTD, apparent total tract digestible.

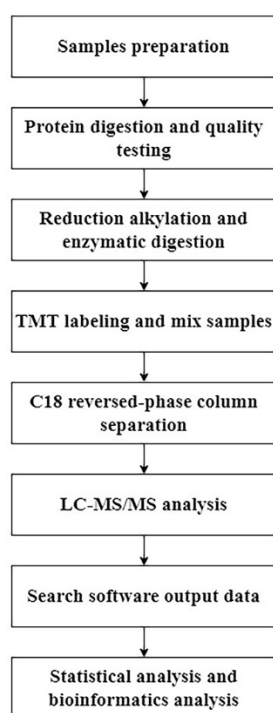

**Figure S1.** Screenshot of the workflow of Proteome Discoverer.
